# Supplementary material for: Microwave-assisted synthesis of graphene–ZnO (Gr–ZnO) nanorods for efficient solar photocatalytic removal of methylene blue as a model pollutant dye
Source: Royal Society of Chemistry journal article supplement (doi:10.1039/d5ma00612k), 2025-01-01
Supplement: d5ma00612k1.pdf [file d5ma00612k1.pdf]

## Supporting Information

### Microwave-assisted synthesis of Graphene-ZnO (Gr-ZnO) nanorods for efficient solar photocatalytic removal of Methylene blue as a model pollutant dye

Laura Khamkhash@, Alima Bazenova@, Kuralay Rustembekkyzy, Bachir Yaou Balarabe, Timur Sh. Atabaev\*

*Department of Chemistry, School of Sciences and Humanities, Nazarbayev University, Astana 010000, Kazakhstan*

@ These authors contributed equally to this work.

\*Corresponding author

E-mail address: [timur.atabaev@nu.edu.kz](mailto:timur.atabaev@nu.edu.kz)

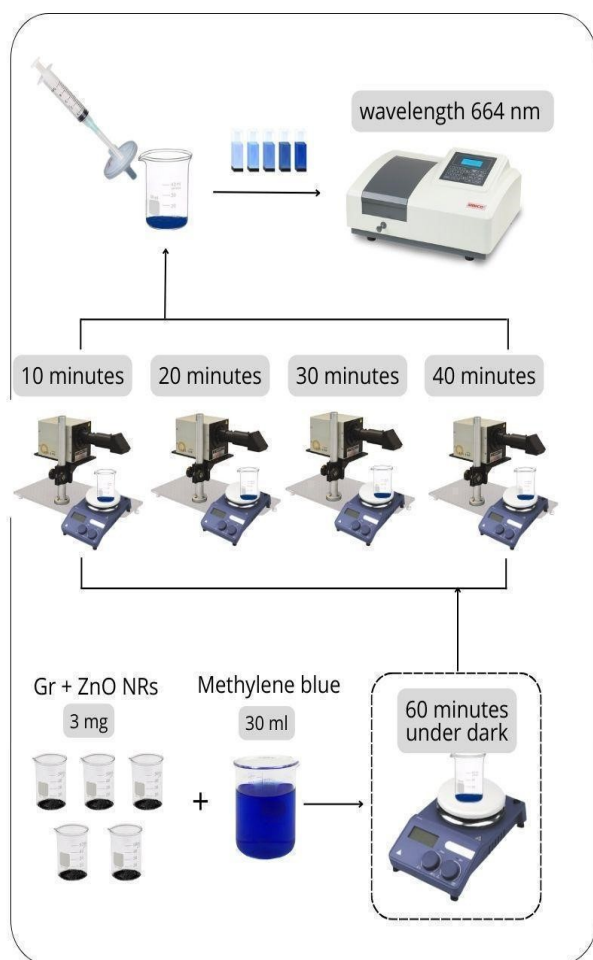

**Figure S1.** Experimental setup for photocatalytic tests using LCS-100 solar simulator at room temperature.

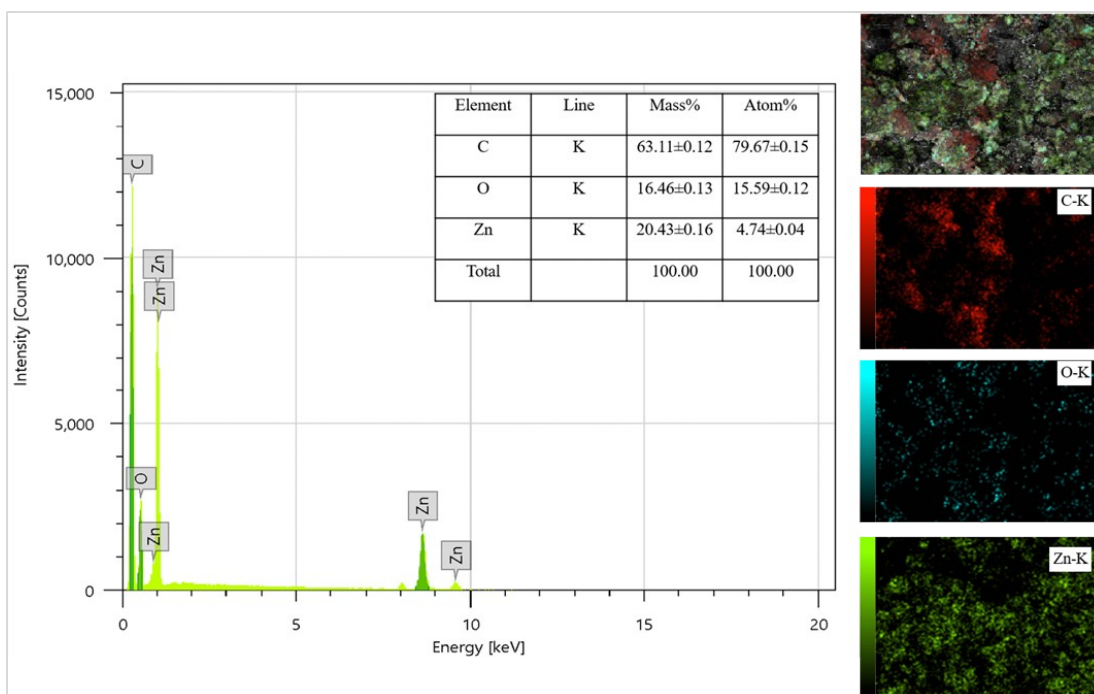

**Figure S2.** EDX elemental mapping of Gr-ZnO nanorods.

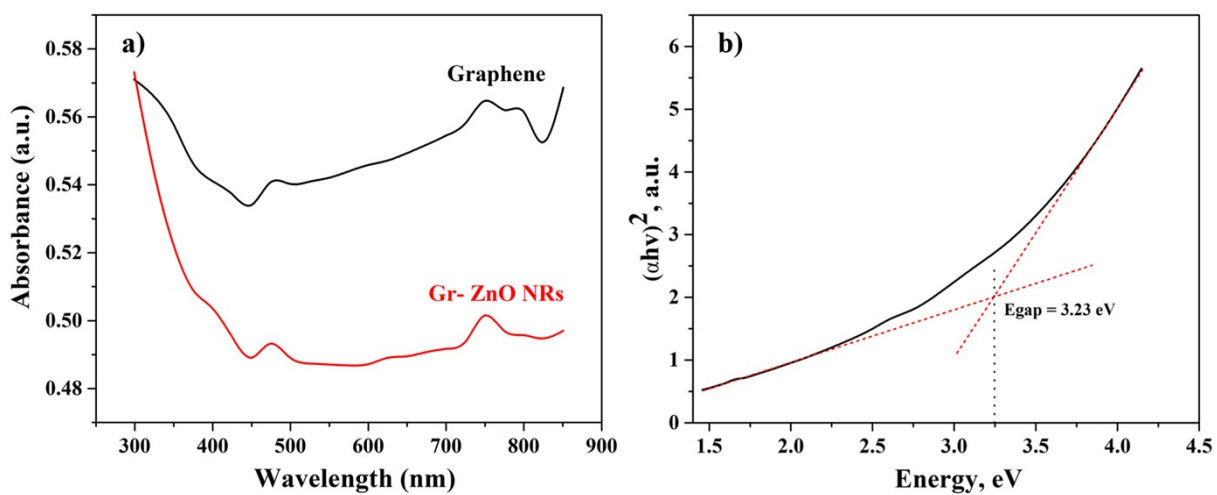

**Figure S3.** a) Absorbance of Gr and Gr-ZnO nanorods, and b) Tauc plot of Gr-ZnO nanorods.

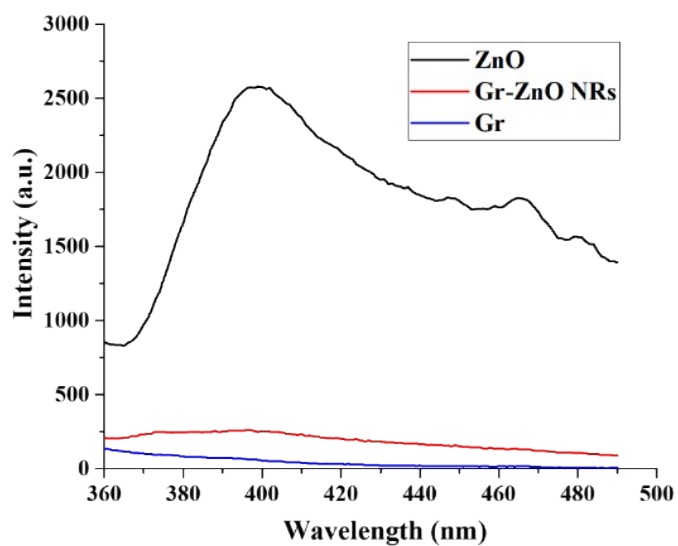

**Figure S4.** PL analysis of Gr, Gr-ZnO, and bare ZnO nanorods.

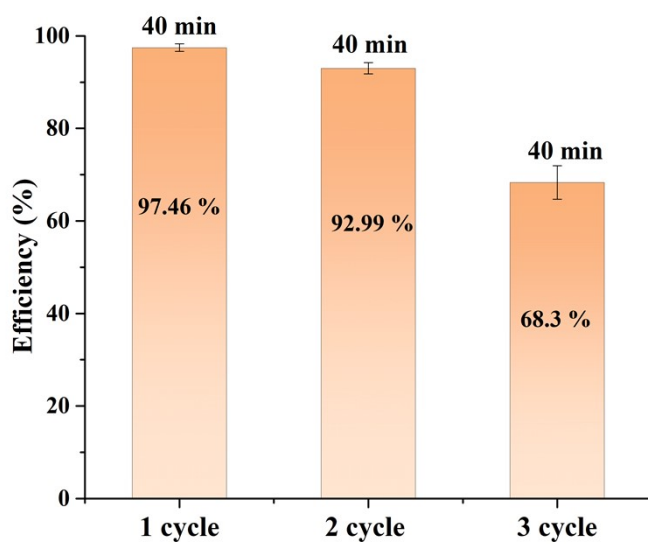

**Figure S5.** Recyclability analysis of Gr-ZnO nanorods.

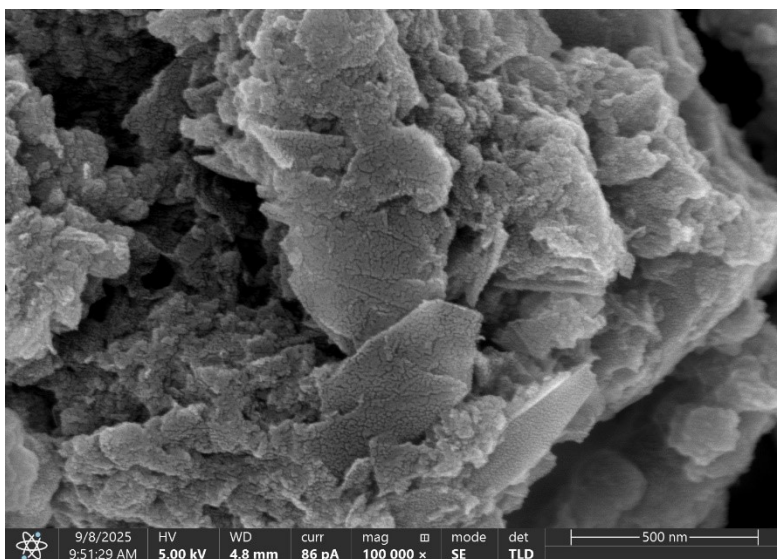

**Figure S6.** SEM image of Gr-ZnO nanorods after 3<sup>rd</sup> cycle.

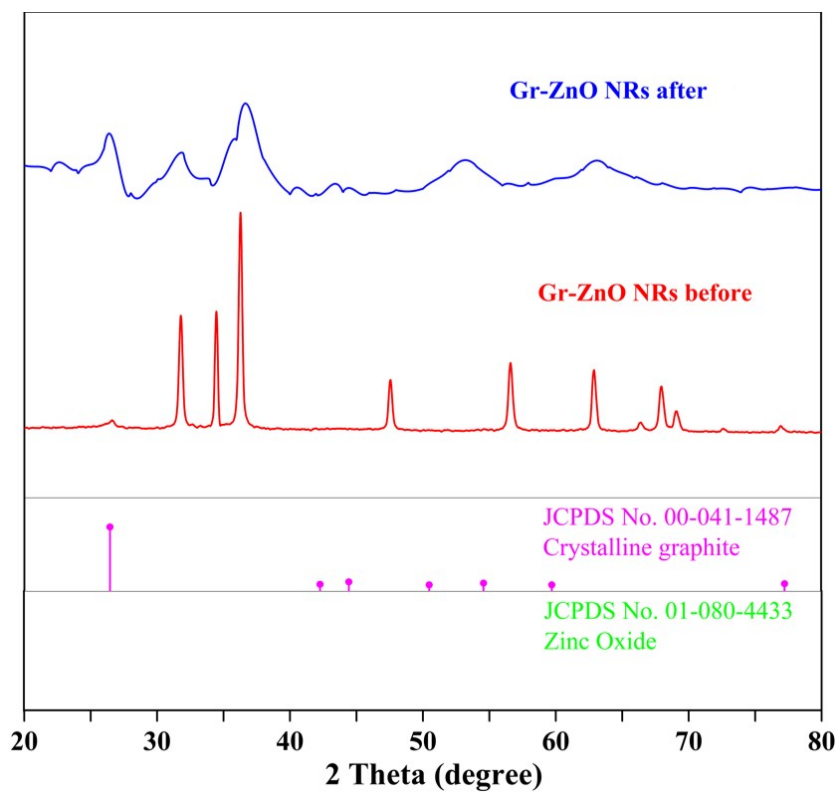

**Figure S7.** XRD pattern of Gr-ZnO nanorods after 3<sup>rd</sup> cycle.

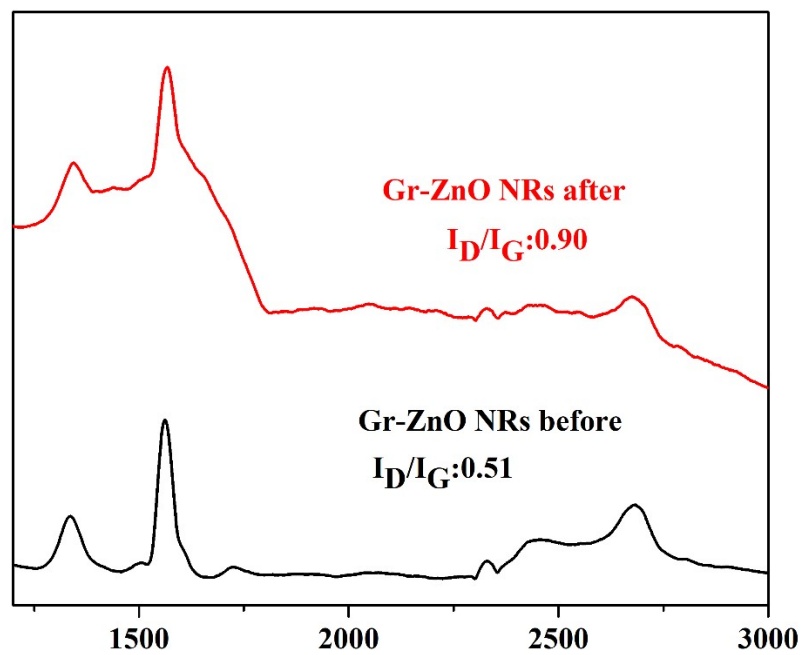

**Figure S8.** Raman analysis of Gr-ZnO nanorods after 3<sup>rd</sup> cycle.
